# Supplementary material for: X-ray photochromism of chalcogenide frameworks linked with metal-amine chelates
Source: Royal Society of Chemistry journal article supplement (doi:10.1039/d2cc05407h), 2022-01-01
Supplement: d2cc05407h1.pdf [file d2cc05407h1.pdf]

*Supporting Information for*

**X-ray photochromism of chalcogenide frameworks linked  
with metal-amine chelates**

Lin-Mei Zhang,<sup>a</sup> Yinan Kong,<sup>b</sup> Rui Zhou,<sup>\*ac</sup> Shang-Fu Yuan,<sup>\*a</sup> and Tao Wu<sup>ab</sup>

<sup>a</sup> College of Chemistry and Materials Science, Guangdong Provincial Key Laboratory of Functional Supramolecular Coordination Materials and Applications, Jinan University, Guangzhou, Guangdong 510632, China.

<sup>b</sup> College of Chemistry, Chemical Engineering and Materials Science, Soochow University, Suzhou, Jiangsu 215123, China.

<sup>c</sup> Department of Developmental and Regenerative Biology, Jinan University, Guangzhou, China

\* Corresponding author E-mails: [sfyuan@jnu.edu.cn](mailto:sfyuan@jnu.edu.cn)

## I. Experimental Section

**Chemicals and Materials.** Tin powder (Sn, 99.99%), zinc acetate dihydrate ( $\text{Zn}(\text{CH}_3\text{COO})_2 \cdot 2\text{H}_2\text{O}$ , 99.9%), sulfur powder (S, 99%), 2-(2-Aminoethylamino)ethanol (AEAE, 99%), 1,2-diaminocyclohexane (DAC, 99%), N,N'-dimethyl-1,2-cyclohexanediamine (DAC-Me), and 1,8-diazabicyclo[5.4.0]undec-7-ene (DBU, 98%) were commercially available and used as received.

### **[Zn(DAC)]<sub>2</sub>SnS<sub>4</sub>·(H<sub>2</sub>O) (1)**

The mixture of  $\text{Zn}(\text{CH}_3\text{COO})_2 \cdot 2\text{H}_2\text{O}$  (55 mg, 0.25 mmol), Sn (30 mg, 0.25 mmol), S (96 mg, 3 mmol), DAC (2 mL), AEAE (1 mL), and DBU (3 mL) were stirred in a 23 mL Teflon-lined stainless steel autoclave for 20 mins. After the vessel was sealed and heated at 180 °C for 8 days, the autoclave was taken out and gradually cooled to room temperature. The pale yellowish octahedral crystals were obtained by filtration, washed with ethanol, and dried in vacuum (yield 30.8% based on Zn). The phase purity of the sample was identified by powder X-ray diffraction measurements.

### **[Zn(DAC-Me)]<sub>2</sub>SnS<sub>4</sub>·(H<sub>2</sub>O) (1-Me)**

Following the aforementioned procedures, **1-Me** can be obtained by using DAC-Me instead of DAC for solvothermal reaction. A large quantity of clear yellowish crystals was obtained by filtration, washed with ethanol, and dried in vacuum (yield 35.8% based on Zn). The phase purity of the sample was identified by powder X-ray diffraction measurements.

## II. Physical measurements

**Powder X-ray Diffraction Characterization.** The Powder X-ray Diffraction (PXRD) data was collected on a desktop diffractometer (D2 PHASER, Bruker, Germany) using Cu-K $\alpha$  ( $\lambda=1.54056$  Å) radiation operated at 30 kV and 10 mA. The samples were ground into fine powders for several minutes before the test.

**Single-Crystal X-ray Crystallography.** Intensity data of **1** were recorded on Bruker Photon II CPAD diffractometer with graphite monochromated Mo K $\alpha$  ( $\lambda = 0.71073$  Å) radiation at 120 K, whereas that of **1-Me** were collected on an Agilent SuperNova Dual system (Cu K $\alpha$ ) at 100 K. Absorption corrections were applied by using the program CrysAlis (multi-scan). The structures were solved by direct method, and nonhydrogen atoms were refined anisotropically by least-squares on  $F^2$  using the SHELXTL program. The data collection and refinement parameters for **1** and **1-Me** are summarized in Table S1.

**Elemental Analysis.** Energy dispersive spectroscopy (EDS) analysis was performed on scanning electron microscope (SEM) equipped with EDS detector. An accelerating voltage of 25 kV and 40 s accumulation time were applied. Elemental analysis of C, H, and N was performed on VARIDEL III elemental analyzer.

|             | Elements (wt.) | N (%) | C (%) | H (%) |
|-------------|----------------|-------|-------|-------|
| <b>1</b>    | Calculated     | 8.97  | 23.08 | 4.81  |
|             | Experimental   | 8.91  | 24.02 | 4.57  |
| <b>1-Me</b> | Calculated     | 8.28  | 28.42 | 5.07  |
|             | Experimental   | 8.29  | 28.05 | 5.18  |

**Thermogravimetric analysis.** Thermogravimetric analysis (TGA) was carried out on a Shimadzu TGA-50 thermal analyzer by heating the sample from room temperature to 800 °C with heating rate of 10 °C /min under N<sub>2</sub> flow.

**Fourier transform infrared (FT-IR) measurement.** FT-IR spectra was performed on a Thermo Nicolet Avatar 6700 FT-IR spectrometer with diamond/zinc selenide optics allowing the instrument to observe from 600-4000  $\text{cm}^{-1}$ .

**UV-vis diffusion reflectance spectra.** Solid-state UV-vis diffusion reflectance spectra (UV-vis DRS) of **1** and **1-Me** were conducted on a SHIMADZU UV-3600 UV-vis-NIR spectrophotometer coupled with an integrating sphere by using  $\text{BaSO}_4$  powder as the reflectance reference. In order to determine the band edge of the direct-gap semiconductor, the relation between the absorption coefficients ( $\alpha$ ) and the incident photon energy ( $h\nu$ ) is exhibited as  $\alpha h\nu = A(h\nu - E_g)^{0.5}$ , where A is a constant that relates to the effective masses associated with the valence and conduction bands, and  $E_g$  is the optical transition gap of the solid material. By extrapolating the linear region to the abscissa, the optical gap can be estimated.

**X-ray photoelectron spectroscopy.** X-ray photoelectron spectroscopy (XPS) was collected with a Leeman prodigy spectrometer equipped with a monochromatic Al  $K\alpha$  X-ray source and a concentric hemispherical analyzer. All binding energies were calibrated using the C (1s) carbon peak (284.6 eV), which was applied as an internal standard.

**Preparation of 1/ITO Film and 1-Me/ITO Film.** To prepare the working electrode, 2 mg crystals of **1** or **1-Me** were first ground into fine powders, and then added into 60  $\mu\text{L}$  of 0.5% Nafion (D-521 dispersion, 5% in water and 1-propanol). After ultrasonic treatment for 30 minutes, the obtained suspensions were dropped onto the surface of ITO substrate, and then dried at room temperature.

**Transient photocurrent and electrochemical impedance spectroscopy measurement.** The transient photocurrent and electrochemical impedance spectroscopy (EIS) experiments were carried out on a CHI760E electrochemistry workstation in a standard three-electrode configuration. The sample coated ITO glass electrode (effective area about 1  $\text{cm}^2$ ), the saturated calomel electrode (SCE), and the Pt plate electrode were used as the working electrode, reference electrode, and counter

electrode, respectively. The light source was a 150 W high pressure xenon lamp with a horizontal of 25 cm away from the surface of the ITO working electrode. Sodium sulphate aqueous solution (0.5 M, 100 mL) was used as the supporting electrolyte.

**Electron spin resonance.** Electron spin resonance (ESR) spectra was obtained on the ER200-SRC Bruker X-band spectrometer, which operates at 9.06 GHz under room temperature. Two crystals of equal weight were ground to powders and packed into capillary tubes with a diameter of 0.05 mm and sealed at both ends.

**X-ray irradiation.** X-ray irradiation was produced by medical radiation equipment with tungsten anode X-ray sources (Monoblock® X-ray generators) with a tube voltage of 80 KVp and a tube current that can be adjusted from 1  $\mu$ A to 0.6 mA, corresponding to calibrated dose rates from 0.705  $\mu$ Gys<sup>-1</sup> to 423  $\mu$ Gys<sup>-1</sup>. A cumulative irradiation of 150 Gy per material (1.225 Gymin<sup>-1</sup>) was applied, with the same irradiation parameters and time.

For the time-dependent coloration experiment, X-ray irradiation were collected on an X-RAD SmART system equipped with W K $\alpha$  radiation source with a tube voltage of 225 KVp and a tube current that can be adjusted from 1 mA to 13 mA, corresponding to calibrated dose rates from 1.941 Gymin<sup>-1</sup> to 26.50 Gymin<sup>-1</sup>. In all these experiments, the dose rate was fixed at 26.50 Gymin<sup>-1</sup>.

### III. Supporting figures

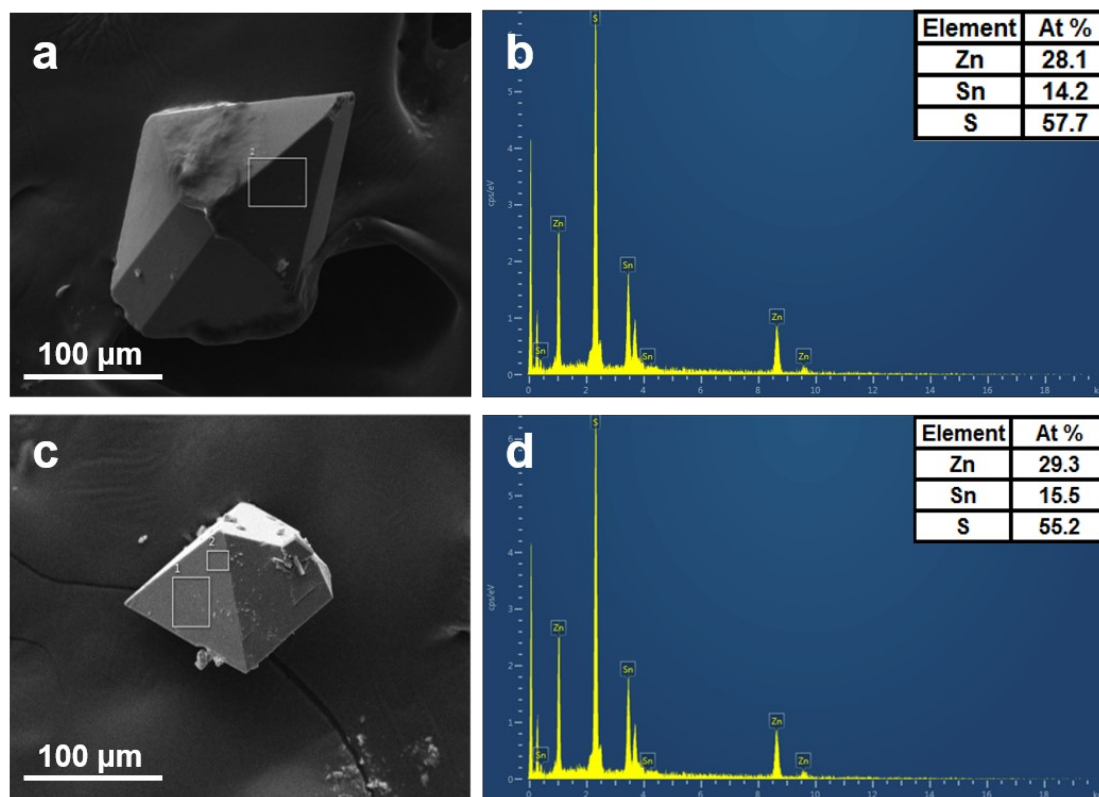

**Figure S1.** a) SEM image and b) EDS pattern of **1** (EDS analysis of the single crystal of **1** revealed a Zn/Sn atomic ratio of 1.98, which is close to the calculated value of 2.00). c) SEM image and d) EDS pattern of **1-Me** (EDS analysis of **1-Me** revealed a Zn/Sn atomic ratio of 1.89, which is close to the calculated value of 2.00).

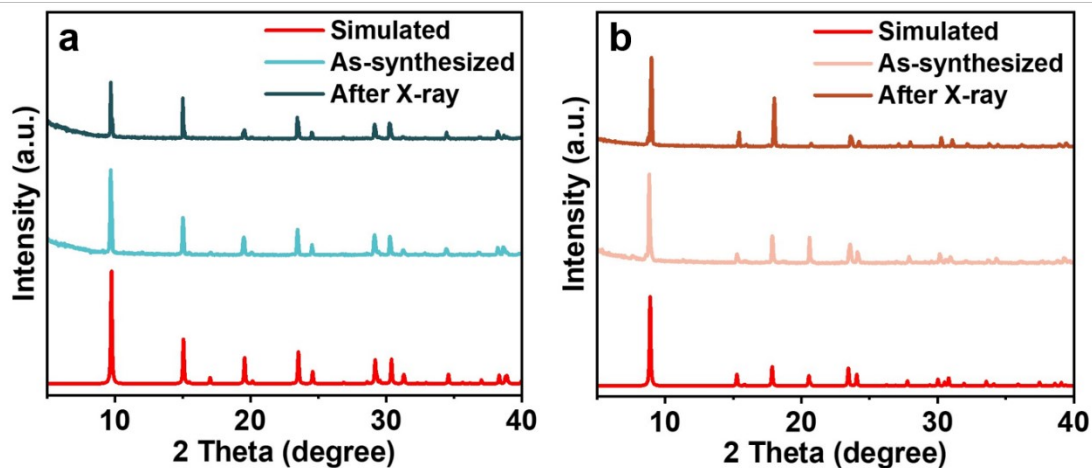

**Figure S2.** The simulated and experimental (as-synthesized and after X-ray irradiation) PXRD patterns of a) **1** and b) **1-Me**.

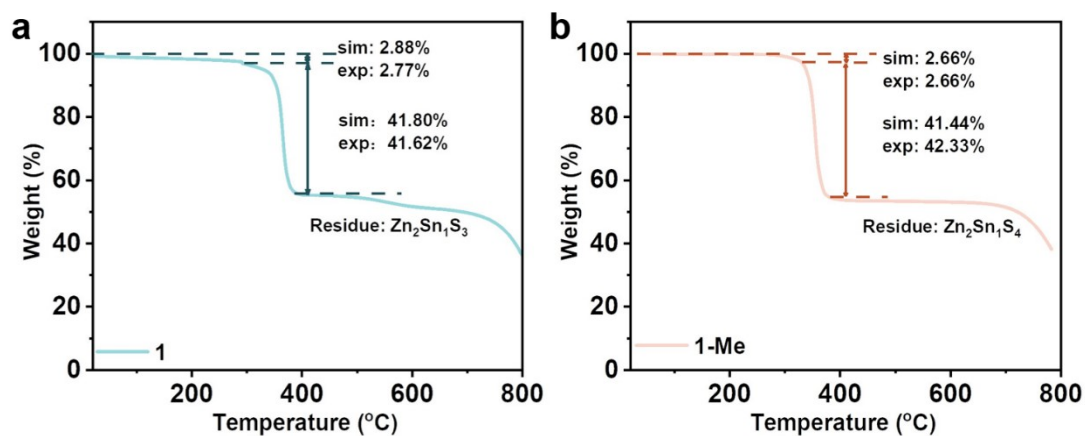

**Figure S3.** TGA curves of a) **1** and b) **1-Me**.

The two chalcogenide frameworks are stable below 300 °C. The first weight loss below 300 °C is attributed to the desorption of one H<sub>2</sub>O molecule. The weight loss from 300-400 °C corresponds to the collapse of the framework and the loss of organic ligands.

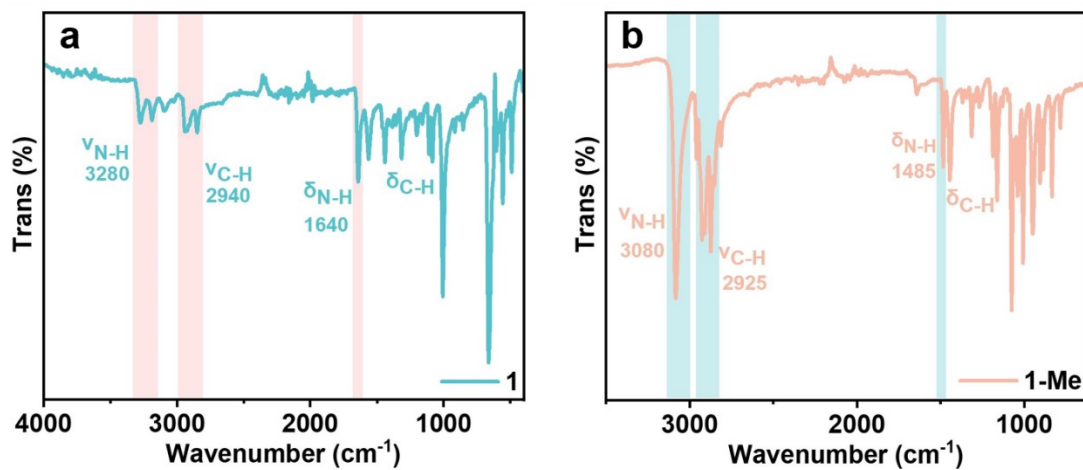

**Figure S4.** FT-IR spectra of a) **1** and b) **1-Me**.

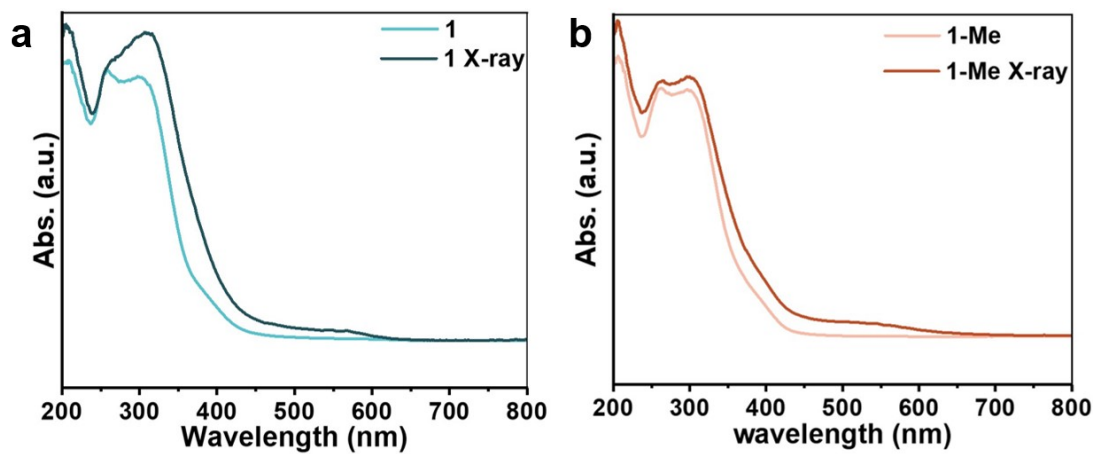

**Figure S5.** Solid-state diffuse reflectance spectra of a) **1** and b) **1-Me** before and after X-ray irradiation.



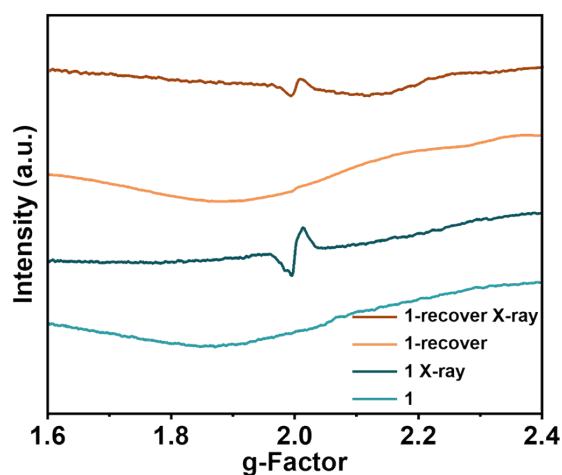

**Figure S6.** ESR spectra for **1** of before and after X-ray irradiation, and recovered upon heating treatment and then re-irradiation.

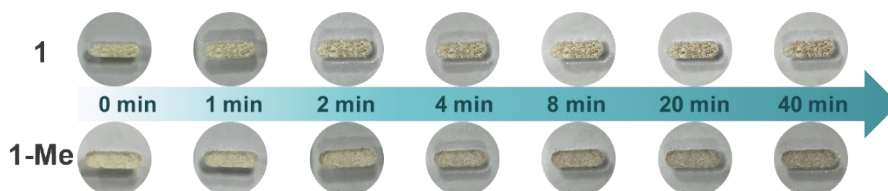

**Figure S7.** Time-dependent color change of crystal samples of **1** and **1-Me** (6 mm × 2 mm × 0.5 mm) under irradiation (W K $\alpha$  radiation source with a tube voltage of 225 KVp and a dose rate of 26.50 Gymin<sup>-1</sup>).

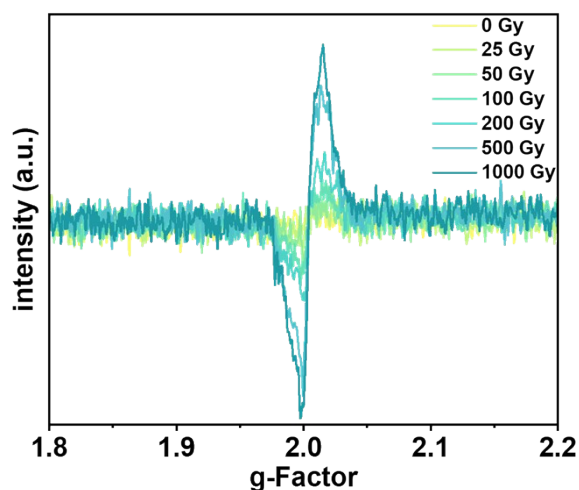

**Figure S8.** ESR spectra of **1** upon X-ray irradiation with different radiation dosages (W K $\alpha$  radiation source with a tube voltage of 225 KVp and a dose rate of 26.50 Gymin<sup>-1</sup>).

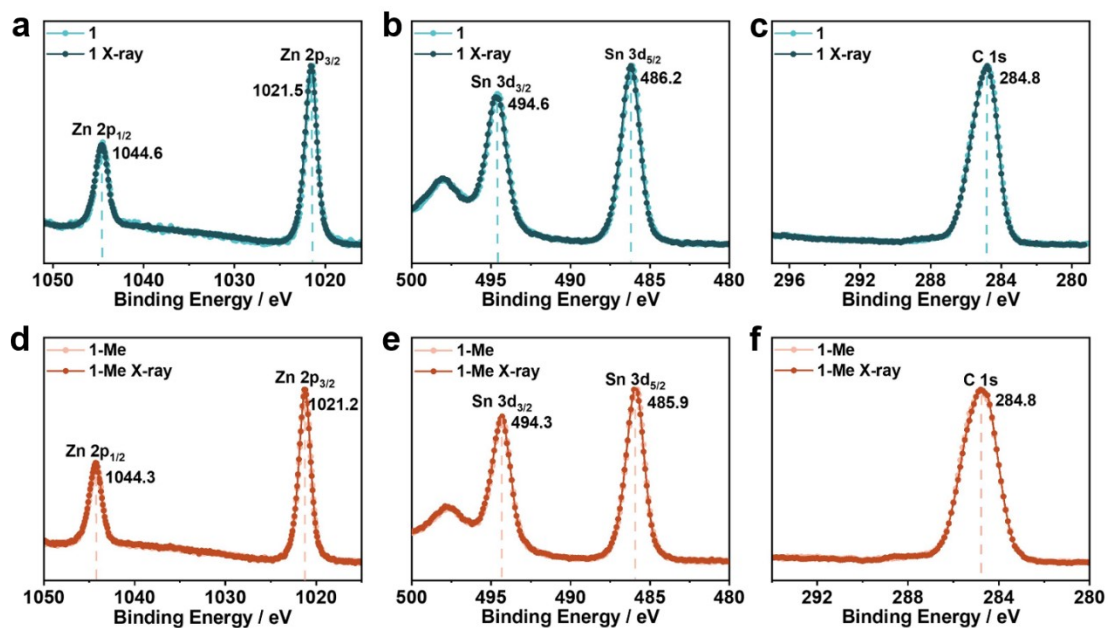

**Figure S9.** High resolution XPS spectra of **1** a) Zn 2p, b) Sn 3d and c) C 1s and **1-Me** d) Zn 2p, e) Sn 3d, and f) C 1s before and after X-ray irradiation.

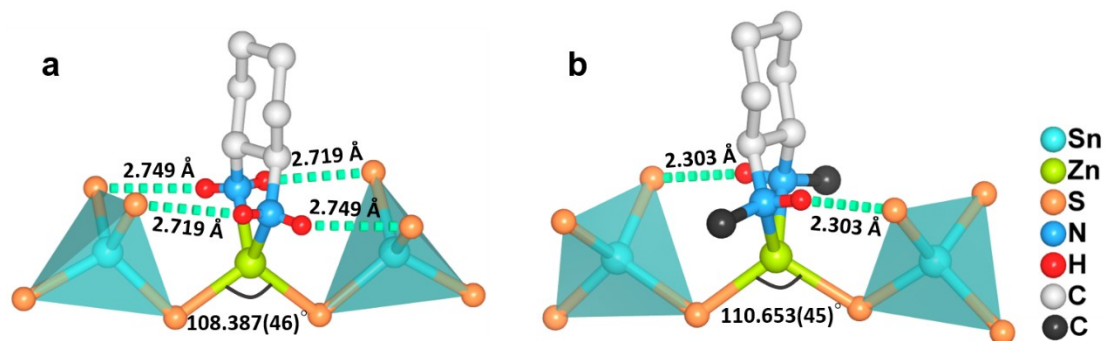

**Figure S10.** a) The [Zn(DAC)] bridged two T1-SnS<sub>4</sub> motif in **1** showing the N–H···S hydrogen bonds. b) The [Zn(DAC-Me)] bridged two T1-SnS<sub>4</sub> motif in **1-Me** showing the N–H···S hydrogen bonds.

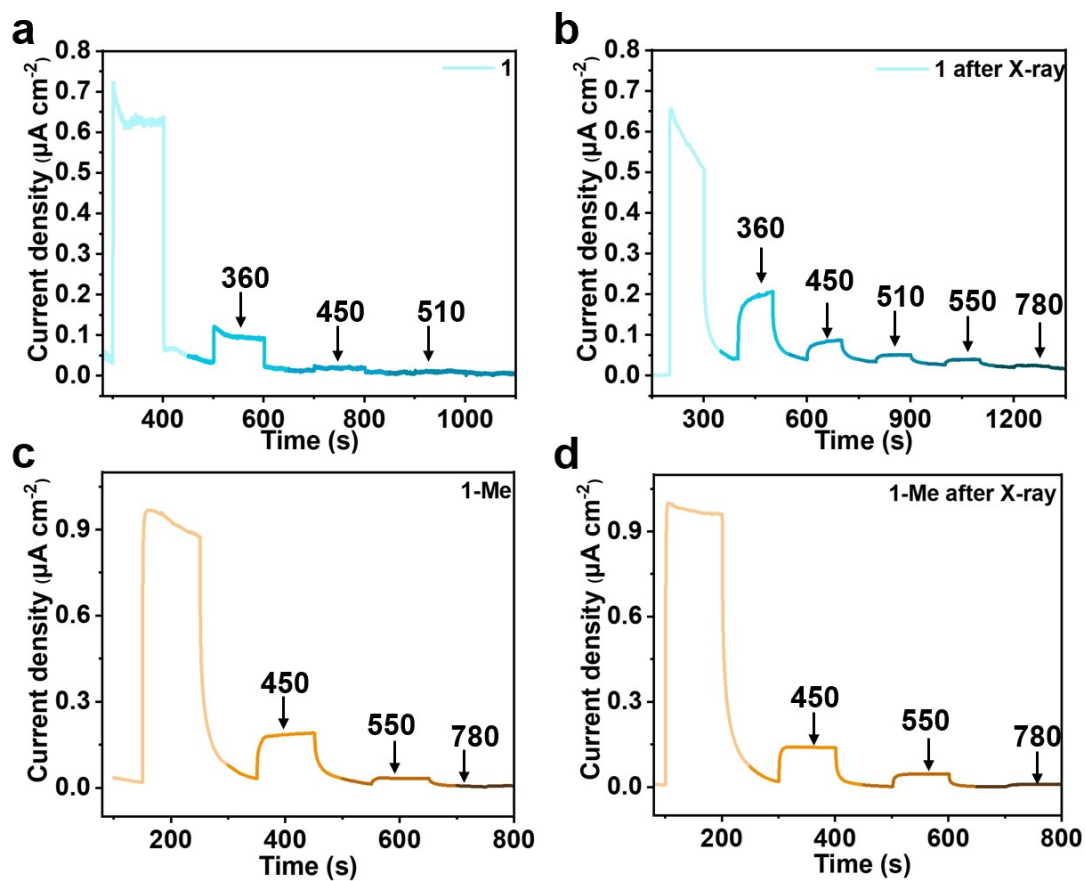

**Figure S11.** Photo response spectra of **1** a) before and b) after X-ray irradiation and **1-Me** c) before and d) after X-ray irradiation with different wavelength of the filters.

**Table S1.** Crystallographic data and structure refinement parameters for **1** and **1-Me**.

| <b>Compounds</b>                                                                | <b>1</b>                              | <b>1-Me</b>                             |
|---------------------------------------------------------------------------------|---------------------------------------|-----------------------------------------|
| <b>Framework Formula</b>                                                        | $C_{12}H_{28}N_4S_4SnZn_2 \cdot H_2O$ | $C_{16}H_{36}N_4S_4Zn_2Sn_1 \cdot H_2O$ |
| <b>Crystal system</b>                                                           | Tetragonal                            | Tetragonal                              |
| <b>Space group</b>                                                              | <i>I</i> -42 <i>d</i>                 | <i>I</i> -42 <i>d</i>                   |
| <b><i>Z</i></b>                                                                 | 16                                    | 16                                      |
| <b><i>a</i> (Å)</b>                                                             | 10.0687(4)                            | 13.44118(7)                             |
| <b><i>b</i> (Å)</b>                                                             | 10.0687(4)                            | 13.44118(7)                             |
| <b><i>c</i> (Å)</b>                                                             | 20.8088(7)                            | 14.28207(11)                            |
| <b><i>α</i> (deg.)</b>                                                          | 90                                    | 90                                      |
| <b><i>β</i> (deg.)</b>                                                          | 90                                    | 90                                      |
| <b><i>γ</i> (deg.)</b>                                                          | 90                                    | 90                                      |
| <b><i>V</i> (Å<sup>3</sup>)</b>                                                 | 2109.57(18)                           | 2580.27(3)                              |
| <b>GOF on <i>F</i><sup>2</sup></b>                                              | 1.130                                 | 1.129                                   |
| <b><i>R</i><sub>1</sub>, <i>wR</i><sub>2</sub> (<i>I</i> &gt; 2σ(<i>I</i>))</b> | 0.0254, 0.0549                        | 0.0266, 0.0749                          |
| <b><i>R</i><sub>1</sub>, <i>wR</i><sub>2</sub> (all data)</b>                   | 0.0300, 0.0588                        | 0.0266, 0.0750                          |
